# Supplementary material for: Unlocking the potential of methionine: a dietary supplement for preventing colitis
Source: Royal Society of Chemistry journal article supplement (doi:10.1039/d4fo02883j), 2024-01-01
Supplement: d4fo02883j1.pdf [file d4fo02883j1.pdf]

Supplement Table 1 Experimental mouse purified diet formula

| Items               | 0.86%Met | 1.55%Met |
|---------------------|----------|----------|
| L-isoleucine        | 0.82%    | 0.82%    |
| L-leucine           | 1.11%    | 1.11%    |
| L-lysine            | 1.80%    | 1.80%    |
| L-methionine        | 0.86%    | 1.55%    |
| L-phenylalanine     | 1.16%    | 1.16%    |
| L-threonine         | 0.82%    | 0.82%    |
| L-tryptophan        | 0.18%    | 0.18%    |
| L-valine            | 0.82%    | 0.82%    |
| L-histidine         | 0.33%    | 0.33%    |
| L-alanine           | 0.51%    | 0.51%    |
| L-arginine          | 1.12%    | 1.12%    |
| L-aspartic acid     | 1.20%    | 1.20%    |
| L-glutamic acid     | 2.70%    | 2.01%    |
| Glycine             | 2.33%    | 2.33%    |
| L-proline           | 1.39%    | 1.39%    |
| L-serine            | 0.90%    | 0.90%    |
| L-tyrosine          | 0.50%    | 0.50%    |
| Choline             | 0.20%    | 0.20%    |
| Corn starch         | 38.50%   | 38.50%   |
| Maltodextrin        | 5.00%    | 5.00%    |
| Glucose             | 20.00%   | 20.00%   |
| Cellulose           | 5.00%    | 5.00%    |
| Corn oil            | 6.50%    | 6.50%    |
| Mixed mineral salts | 1.00%    | 1.00%    |
| Dicalcium phosphate | 1.30%    | 1.30%    |
| Calcium carbonate   | 0.55%    | 0.55%    |
| Potassium citrate   | 1.65%    | 1.65%    |
| Sodium bicarbonate  | 0.75%    | 0.75%    |
| Mixed vitamins      | 1.00%    | 1.00%    |
| Total               | 100.00%  | 100.00%  |
